# Supplementary material for: An Improved In Vitro Blood-Brain Barrier Model for the Evaluation of Drug Permeability Using Transwell with Shear Stress
Source: MDPI journal article supplement (doi:10.3390/pharmaceutics16010048), 2023-12-28
Supplement: s1 [file s1]

**Table S1.** The PCR primer sequences

| Gene                      | Forward primer (5'-3')   | Reverse primer (5'-3') | Ref |
|---------------------------|--------------------------|------------------------|-----|
| <i>CLDN5</i> (Claudin-5)  | GTGCTACACCCAGTGTGCTG     | CCAGTTCAGGTGACACCACTT  | [1] |
| <i>OCN</i> (Occludin)     | AAGGTCAAAGAGAACAGAGCAAGA | TATCCCTGATCCAGTCCTCCTC | [2] |
| <i>CDH5</i> (VE-cadherin) | AATGCGTCCGTGCCTGAGTCGT   | GTGGTCTCCCACAGTGGGGTCG | [1] |
| GAPDH                     | CAACTACTGGTTTACATGTTC    | GCCAGTGGACTCCACGAC     | [3] |

**Table S2.** The LC-MS/MS condition 1

| Instrument              | LC<br>MS/MS                                           | Agilent 1260 binary HPLC system<br>Agilent 6460 Triple-quadrupole mass spectrometer |                      |          |
|-------------------------|-------------------------------------------------------|-------------------------------------------------------------------------------------|----------------------|----------|
| Column                  | Agilent Poroshell 120 EC-C18 (3.0 × 50 mm, 2.7 μm)    |                                                                                     |                      |          |
| Mobile phase            | A : 5 mM Ammonium formate in water (pH 4)<br>B : MeOH |                                                                                     |                      |          |
| Flow rate               | 0.3 mL/min                                            |                                                                                     |                      |          |
| Column oven temperature | 40 °C                                                 |                                                                                     |                      |          |
| Injection volume        | 5 μL                                                  |                                                                                     |                      |          |
| MRM condition           | m/z                                                   | Fragmentor (V)                                                                      | Collision Energy (V) | Polarity |
| Atenolol                | 267→145                                               | 123                                                                                 | 24                   | (+)      |
| Dantrolene              | 313→200                                               | 100                                                                                 | 10                   | (-)      |
| Naproxen                | 231.1→185.1                                           | 75                                                                                  | 6                    | (+)      |
| Phenytoin               | 253→182                                               | 100                                                                                 | 12                   | (+)      |

**Table S3.** The LC-MS/MS condition 2

| Instrument              | LC<br>MS/MS                                           | Shimadzu UFLC XR instrument<br>TSQ Quantum Ultra triple quadrupole mass spectrometers |            |          |
|-------------------------|-------------------------------------------------------|---------------------------------------------------------------------------------------|------------|----------|
| Column                  | YMC triart C18 (2.0 × 50 mm, 3 μm)                    |                                                                                       |            |          |
| Mobile phase            | A : 5 mM Ammonium formate in water (pH 4)<br>B : MeOH |                                                                                       |            |          |
| Flow rate               | 0.3 mL/min                                            |                                                                                       |            |          |
| Column oven temperature | 40 °C                                                 |                                                                                       |            |          |
| Injection volume        | 10 μL                                                 |                                                                                       |            |          |
| MRM condition           | m/z                                                   | Collison Energy (V)                                                                   | T Lens (V) | Polarity |
| Carbamazepine           | 237.2→194.1                                           | 19                                                                                    | 122        | (+)      |
| Donepezil               | 380.3→91.1                                            | 35                                                                                    | 95         | (+)      |
| Fexofenadine            | 502.2→466.4                                           | 25                                                                                    | 130        | (+)      |
| Metoprolol              | 268.2→133.1                                           | 25                                                                                    | 135        | (+)      |
| Midazolam               | 326.1→291.3                                           | 25                                                                                    | 142        | (+)      |
| Propranolol             | 260→183.1                                             | 17                                                                                    | 163        | (+)      |
| Sulpiride               | 342.3→112                                             | 25                                                                                    | 155        | (+)      |

1. Li, N.; Sui, Z.; Liu, Y.; Wang, D.; Ge, G.; Yang, L. A fast screening model for drug permeability assessment based on native small intestinal extracellular matrix. *RSC Adv* **2018**, *8*, 34514-34524, doi:10.1039/c8ra05992f.
2. Ito, R.; Morio, H.; Baba, T.; Sakaguchi, Y.; Wakayama, N.; Isogai, R.; Yamaura, Y.; Komori, T.; Furihata, T. In Vitro-In Vivo Correlation of Blood-Brain Barrier Permeability of Drugs: A Feasibility Study Towards Development of Prediction Methods for Brain Drug Concentration in Humans. *Pharm Res* **2022**, *39*, 1575-1586, doi:10.1007/s11095-022-03189-y.
3. Cai, B.; Miao, Y.; Liu, Y.; Xu, X.; Guan, S.; Wu, J.; Liu, Y. Nuclear multidrug-resistance related protein 1 contributes to multidrug-resistance of mucoepidermoid carcinoma mainly via regulating multidrug-resistance protein 1: a human mucoepidermoid carcinoma cells model and Spearman's rank correlation analysis. *PLoS One* **2013**, *8*, e69611, doi:10.1371/journal.pone.0069611.
